# Supplementary material for: Tuning photoelectron dynamic behavior of thiolate-protected MAu24 nanoclusters via heteroatom substitution
Source: Royal Society of Chemistry journal article supplement (doi:10.1039/d2nh00281g), 2022-01-01
Supplement: d2nh00281g1.pdf [file d2nh00281g1.pdf]

## Electronic supplementary information

### Tuning photoelectron dynamic behavior of thiolate-protected MAu<sub>24</sub> nanoclusters via heteroatom substitution

Xueke Yu,<sup>a</sup> Yuanze Sun,<sup>a</sup> Wen-wu Xu,<sup>b</sup> Junyu Fan,<sup>c</sup> Junfeng Gao,<sup>a</sup> Xue Jiang,<sup>a</sup> Yan  
Su,<sup>\*a</sup> and Jijun Zhao<sup>a</sup>

---

<sup>a</sup>Key Laboratory of Materials Modification by Laser, Ion and Electron Beams (Dalian University of Technology), Ministry of Education, Dalian 116024, China.

<sup>b</sup>Department of Physics, School of Physical Science and Technology (Ningbo University), Ningbo 315211, China

<sup>c</sup>Department of Physics, (Taiyuan Normal University), Jinzhong 030619, China

## S1. NAMD computational methods

The time-domain nonadiabatic molecular dynamics (NAMD) simulation was performed with the Hefei-NAMD code<sup>1</sup> to investigate the excited-electron relaxation and e–h recombination dynamics in MAu<sub>24</sub> (M = Pd, Pt, Cd, and Hg) nanoclusters. After the initial structure fully optimized at 0 K, the *ab initio* molecular dynamics (AIMD)<sup>2</sup> simulations were carried out to heat up the temperature of MAu<sub>24</sub> nanoclusters to 300 K, in which the velocity scaling algorithm was adopted to achieve thermal equilibrium. Then, a 2 ps molecular dynamics simulation was performed in the microcanonical ensemble to generate the molecular dynamics trajectory with a 1 fs time step. Due to the strong coupling between higher energy states and LUMO+1 (process  $e\mathcal{T}$  in Fig. 3b) and the quantum decoherence effect is weak enough to be ignored, the process  $e\mathcal{T}$  was calculated by the fewest switches surface hopping (FSSH)<sup>3,4</sup> method. Moreover, the decoherence induced surface hopping (DISH)<sup>5,6</sup> method was adopted in the relaxation from LUMO+1 to LUMO and the e–h recombination process (processes  $\mathcal{E}$  and  $\bullet$  in Fig. 3b), since these processes have larger bandgap and quantum decoherence effect. In all simulations mentioned above, the Brillouin zones were sampled by  $\Gamma$  point.

**Table S1.** The relaxation time ( $\tau$ ) and the vibrational modes coupled with the process  $\mathcal{E}$ ,  $\mathcal{E}$ , and  $\bullet$  for MAu<sub>24</sub> nanoclusters.

| Systems            | process $\mathcal{E}$ |                                          | process $\mathcal{E}$ |                                          | process $\bullet$ |                                          |
|--------------------|-----------------------|------------------------------------------|-----------------------|------------------------------------------|-------------------|------------------------------------------|
|                    | $\tau$<br>(fs)        | vibrational<br>modes (cm <sup>-1</sup> ) | $\tau$<br>(ps)        | vibrational<br>modes (cm <sup>-1</sup> ) | $\tau$<br>(ns)    | vibrational<br>modes (cm <sup>-1</sup> ) |
| PdAu <sub>24</sub> | 190                   | 50, 83, 116, 166, 217                    | 250                   | 33, 83                                   | 0.126             | 33                                       |
| PtAu <sub>24</sub> | 380                   | 50, 83, 133, 234                         | 483                   | 50                                       | 0.233             | 17, 67                                   |
| CdAu <sub>24</sub> | 83                    | 33, 100, 250, 517                        | 86                    | 17, 50, 117                              | 8.03              | 50                                       |
| HgAu <sub>24</sub> | 35                    | 33, 117, 167, 217,<br>267, 400, 550      | 139                   | 33, 67, 167, 217                         | 7.55              | 50, 100                                  |

**Table S2.** The average NAC elements along 2 ps NAMD trajectory between different states from HE states to HOMO for excited-electron relaxation dynamics of PdAu<sub>24</sub> nanoclusters.

| NAC (eV) | HOMO | LUMO | +1 (1) | +1 (2) | +2    | +3    | +4    | +5    | HE    |
|----------|------|------|--------|--------|-------|-------|-------|-------|-------|
| HOMO     | 0.00 | 1.21 | 0.57   | 0.52   | 0.70  | 0.74  | 0.52  | 0.53  | 0.44  |
| LUMO     | 1.21 | 0.00 | 1.32   | 1.12   | 0.80  | 0.71  | 0.73  | 0.67  | 0.66  |
| +1 (1)   | 0.57 | 1.32 | 0.00   | 25.66  | 2.16  | 1.55  | 1.49  | 1.09  | 1.19  |
| +1 (2)   | 0.52 | 1.12 | 25.66  | 0.00   | 2.81  | 2.01  | 1.72  | 1.44  | 1.20  |
| +2       | 0.70 | 0.80 | 2.16   | 2.81   | 0.00  | 30.22 | 6.76  | 5.11  | 3.65  |
| +3       | 0.74 | 0.71 | 1.55   | 2.01   | 30.22 | 0.00  | 24.70 | 7.97  | 5.93  |
| +4       | 0.52 | 0.73 | 1.49   | 1.72   | 6.76  | 24.70 | 0.00  | 41.32 | 11.37 |
| +5       | 0.53 | 0.67 | 1.09   | 1.44   | 5.11  | 7.97  | 41.32 | 0.00  | 45.08 |
| HE       | 0.44 | 0.66 | 1.19   | 1.20   | 3.65  | 5.93  | 11.37 | 45.08 | 0.00  |

**Table S3.** The average NAC elements along 2 ps NAMD trajectory between different states from HE states to HOMO for excited-electron relaxation dynamics of PtAu<sub>24</sub> nanoclusters.

| NAC (eV) | HOMO | LUMO | +1 (1) | +1 (2) | +2    | +3    | +4    | +5    | HE    |
|----------|------|------|--------|--------|-------|-------|-------|-------|-------|
| HOMO     | 0.00 | 1.48 | 0.66   | 0.63   | 0.63  | 0.77  | 0.52  | 0.50  | 0.45  |
| LUMO     | 1.48 | 0.00 | 0.85   | 1.42   | 0.73  | 0.88  | 0.89  | 0.58  | 0.50  |
| +1 (1)   | 0.66 | 0.85 | 0.00   | 18.97  | 2.50  | 2.14  | 2.92  | 1.59  | 1.22  |
| +1 (2)   | 0.63 | 1.42 | 18.97  | 0.00   | 5.79  | 2.19  | 1.85  | 1.71  | 1.59  |
| +2       | 0.63 | 0.73 | 2.50   | 5.79   | 0.00  | 32.39 | 7.65  | 6.39  | 4.28  |
| +3       | 0.77 | 0.88 | 2.14   | 2.19   | 32.39 | 0.00  | 33.21 | 8.67  | 6.76  |
| +4       | 0.52 | 0.89 | 2.92   | 1.85   | 7.66  | 33.21 | 0.00  | 37.77 | 11.25 |
| +5       | 0.50 | 0.58 | 1.59   | 1.71   | 6.39  | 8.67  | 37.77 | 0.00  | 50.96 |
| HE       | 0.45 | 0.50 | 1.22   | 1.59   | 4.28  | 6.76  | 11.25 | 50.96 | 0.00  |

**Table S4.** The average NAC elements along 2 ps NAMD trajectory between different states from HE states to HOMO for excited-electron relaxation dynamics of CdAu<sub>24</sub> nanoclusters.

| NAC (eV) | HOMO | L (1) | L (2) | +1    | +2    | +3    | +4    | +5    | HE    |
|----------|------|-------|-------|-------|-------|-------|-------|-------|-------|
| HOMO     | 0.00 | 0.73  | 0.66  | 1.58  | 1.51  | 1.19  | 1.24  | 0.90  | 0.92  |
| L (1)    | 0.73 | 0.00  | 16.74 | 1.96  | 1.58  | 1.32  | 1.38  | 1.05  | 1.00  |
| L (2)    | 0.66 | 16.74 | 0.00  | 2.44  | 4.69  | 3.70  | 2.50  | 2.19  | 1.89  |
| +1       | 1.58 | 1.96  | 2.44  | 0.00  | 25.57 | 4.69  | 3.70  | 2.50  | 2.19  |
| +2       | 1.51 | 1.58  | 4.69  | 25.57 | 0.00  | 24.06 | 5.71  | 3.73  | 3.21  |
| +3       | 1.19 | 1.32  | 3.70  | 4.69  | 24.06 | 0.00  | 28.02 | 6.80  | 4.20  |
| +4       | 1.24 | 1.38  | 2.50  | 3.70  | 5.71  | 28.02 | 0.00  | 26.04 | 8.69  |
| +5       | 0.90 | 1.05  | 2.19  | 2.50  | 3.73  | 6.80  | 26.04 | 0.00  | 43.38 |
| HE       | 0.92 | 1.00  | 1.89  | 2.19  | 3.21  | 4.20  | 8.69  | 43.38 | 0.00  |

**Table S5.** The average NAC elements along 2 ps NAMD trajectory between different states from HE states to HOMO for excited-electron relaxation dynamics of HgAu<sub>24</sub> nanoclusters.

| NAC (eV) | HOMO | L (1) | L (2) | +1    | +2    | +3    | +4    | +5    | HE    |
|----------|------|-------|-------|-------|-------|-------|-------|-------|-------|
| HOMO     | 0.00 | 0.88  | 0.74  | 1.85  | 1.36  | 1.15  | 0.97  | 1.01  | 0.90  |
| L (1)    | 0.88 | 0.00  | 14.98 | 2.10  | 1.43  | 1.12  | 1.06  | 1.21  | 1.00  |
| L (2)    | 0.74 | 14.98 | 0.00  | 2.25  | 6.74  | 4.34  | 3.12  | 2.39  | 2.27  |
| +1       | 1.85 | 2.10  | 2.25  | 0.00  | 24.84 | 6.74  | 4.34  | 3.12  | 2.39  |
| +2       | 1.36 | 1.43  | 6.74  | 24.84 | 0.00  | 37.06 | 7.19  | 3.88  | 3.42  |
| +3       | 1.15 | 1.12  | 4.34  | 6.74  | 37.06 | 0.00  | 32.99 | 6.77  | 4.67  |
| +4       | 0.97 | 1.06  | 3.12  | 4.34  | 7.19  | 32.99 | 0.00  | 38.02 | 8.34  |
| +5       | 1.01 | 1.21  | 2.39  | 3.12  | 3.88  | 6.77  | 38.02 | 0.00  | 36.97 |
| HE       | 0.90 | 1.00  | 2.27  | 2.39  | 3.42  | 4.67  | 8.34  | 36.97 | 0.00  |

**Table S6.** Pure-dephasing ( $\tau$ ) along 2 ps NAMD trajectory between the LUMO+1 and HOMO for excited-electron relaxation dynamics of PdAu<sub>24</sub> nanoclusters.

| $\tau$ (fs) | HOMO | LUMO | LUMO+1 (1) | LUMO+1 (2) |
|-------------|------|------|------------|------------|
| HOMO        | 0.00 | 3.13 | 6.31       | 5.90       |
| LUMO        | 3.13 | 0.00 | 3.88       | 3.81       |
| LUMO+1 (1)  | 6.31 | 3.88 | 0.00       | 10.17      |
| LUMO+1 (2)  | 5.90 | 3.81 | 10.17      | 0.00       |



**Table S7.** Pure-dephasing ( $\tau$ ) along 2 ps NAMD trajectory between the LUMO+1 and HOMO for excited-electron relaxation dynamics of PtAu<sub>24</sub> nanoclusters.

| $\tau$ (fs) | HOMO | LUMO | LUMO+1 (1) | LUMO+1 (2) |
|-------------|------|------|------------|------------|
| HOMO        | 0.00 | 6.38 | 5.11       | 6.84       |
| LUMO        | 6.38 | 0.00 | 4.53       | 5.62       |
| LUMO+1 (1)  | 5.11 | 4.53 | 0.00       | 9.88       |
| LUMO+1 (2)  | 6.84 | 5.62 | 9.88       | 0.00       |

**Table S8.** Pure-dephasing ( $\tau$ ) along 2 ps NAMD trajectory between the LUMO+1 and HOMO for excited-electron relaxation dynamics of CdAu<sub>24</sub> nanoclusters.

| $\tau$ (fs) | HOMO | LUMO (1) | LUMO (2) | LUMO+1 |
|-------------|------|----------|----------|--------|
| HOMO        | 0.00 | 6.51     | 6.43     | 6.55   |
| LUMO (1)    | 6.51 | 0.00     | 11.11    | 7.57   |
| LUMO (2)    | 6.43 | 11.11    | 0.00     | 7.81   |
| LUMO+1      | 6.55 | 7.57     | 7.81     | 0.00   |

**Table S9.** Pure-dephasing ( $\tau$ ) along 2 ps NAMD trajectory between the LUMO+1 and HOMO for excited-electron relaxation dynamics of HgAu<sub>24</sub> nanoclusters.

| $\tau$ (fs) | HOMO | LUMO (1) | LUMO (2) | LUMO+1 |
|-------------|------|----------|----------|--------|
| HOMO        | 0.00 | 8.56     | 9.58     | 5.05   |
| LUMO (1)    | 8.56 | 0.00     | 14.14    | 5.11   |
| LUMO (2)    | 9.58 | 14.14    | 0.00     | 5.21   |
| LUMO+1      | 5.05 | 5.11     | 5.21     | 0.00   |

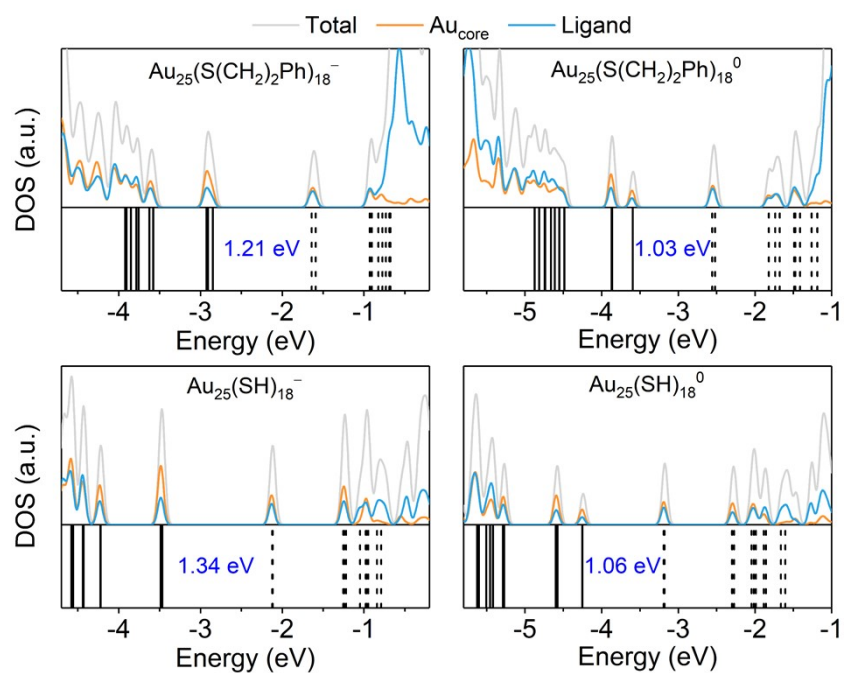

**Fig. S1** Kohn–Sham orbitals (bottom panel) and density of states (top panel) of  $\text{Au}_{25}(\text{SR})_{18}^-$  ( $\text{R} = \text{C}_2\text{H}_4\text{Ph}$  and  $\text{H}$ ) and  $\text{Au}_{25}(\text{SR})_{18}^0$  from DFT calculations. The HOMO-LUMO gaps are shown in blue values.

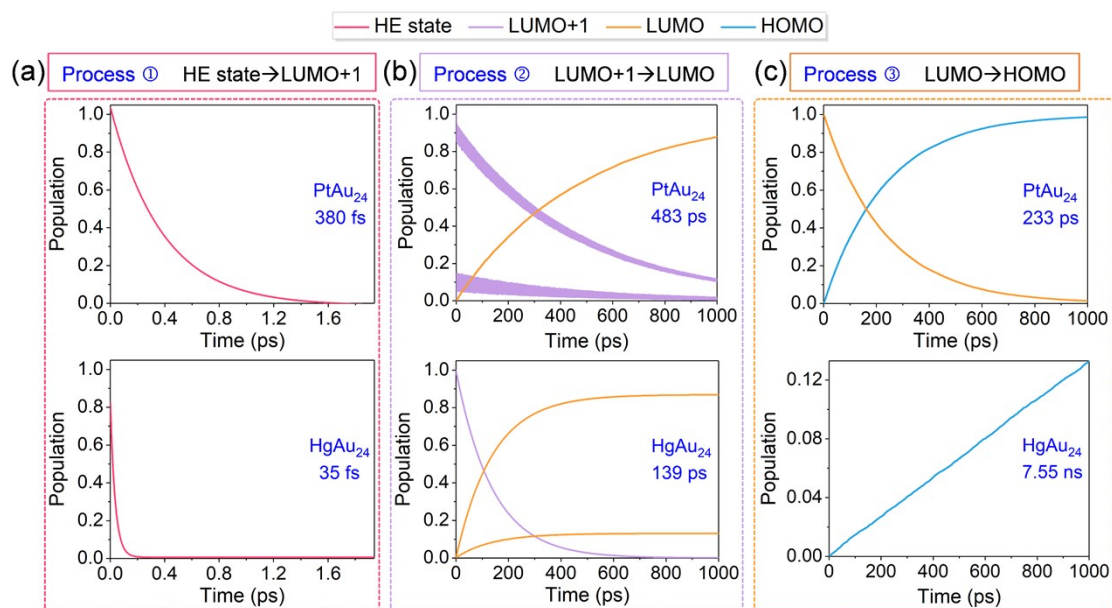

**Fig. S2** Population evolution of energy states of PtAu<sub>24</sub> and HgAu<sub>24</sub> nanoclusters during three electron relaxation processes from HE states to HOMO. The three relaxation processes include  $e^-$  relaxation from higher-energy (HE) states to LUMO+1 (a),  $e^-$  relaxation from LUMO+1 to LUMO (b),  $e^-h$  recombination between LUMO and HOMO (c).

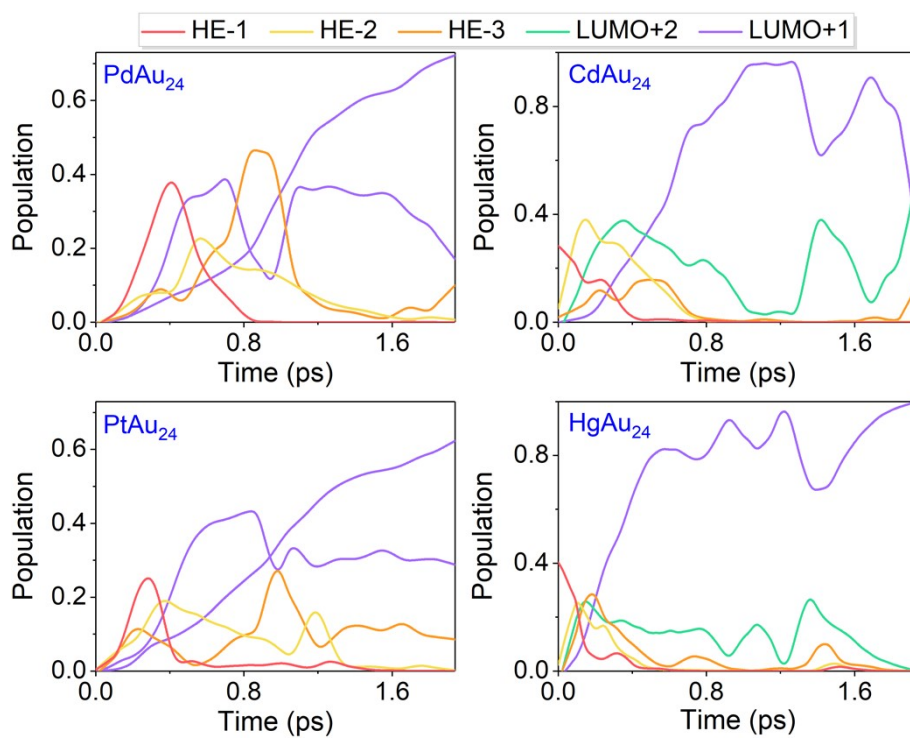

**Fig. S3** The population evolution of relaxation states between HE-1 and LUMO+1 of MAu<sub>24</sub> nanoclusters during the electron relaxation from HE states to LUMO+1.

## Reference

- 1 Q. Zheng, W. Chu, C. Zhao, L. Zhang, H. Guo, Y. Wang, X. Jiang and J. Zhao, *WIREs Comput. Mol. Sci.*, 2019, **9**, e1411.
- 2 G. Kresse and J. Hafner, *Phys. Rev. B*, 1993, **47**, 558-561.
- 3 C. F. Craig, W. R. Duncan and O. V. Prezhdo, *Phys. Rev. Lett.*, 2005, **95**, 163001.
- 4 J. C. Tully, *J. Chem. Phys.*, 1990, **93**, 1061-1071.
- 5 H. M. Jaeger, S. Fischer and O. V. Prezhdo, *J. Chem. Phys.*, 2012, **137**, 22A545.
- 6 D. J. Trivedi and O. V. Prezhdo, *J. Phys. Chem. A*, 2015, **119**, 8846-8853.
